# Supplementary material
Source: MDPI journal article supplement (https://www.mdpi.com/2073-4441/14/13/2032)
Supplement: s1 [file s1]

**Changing conditions and consequences of weather extremes on nutrient dynamics in a shallow eutrophic lake observed during a three-year monitoring study - Supplementary information**

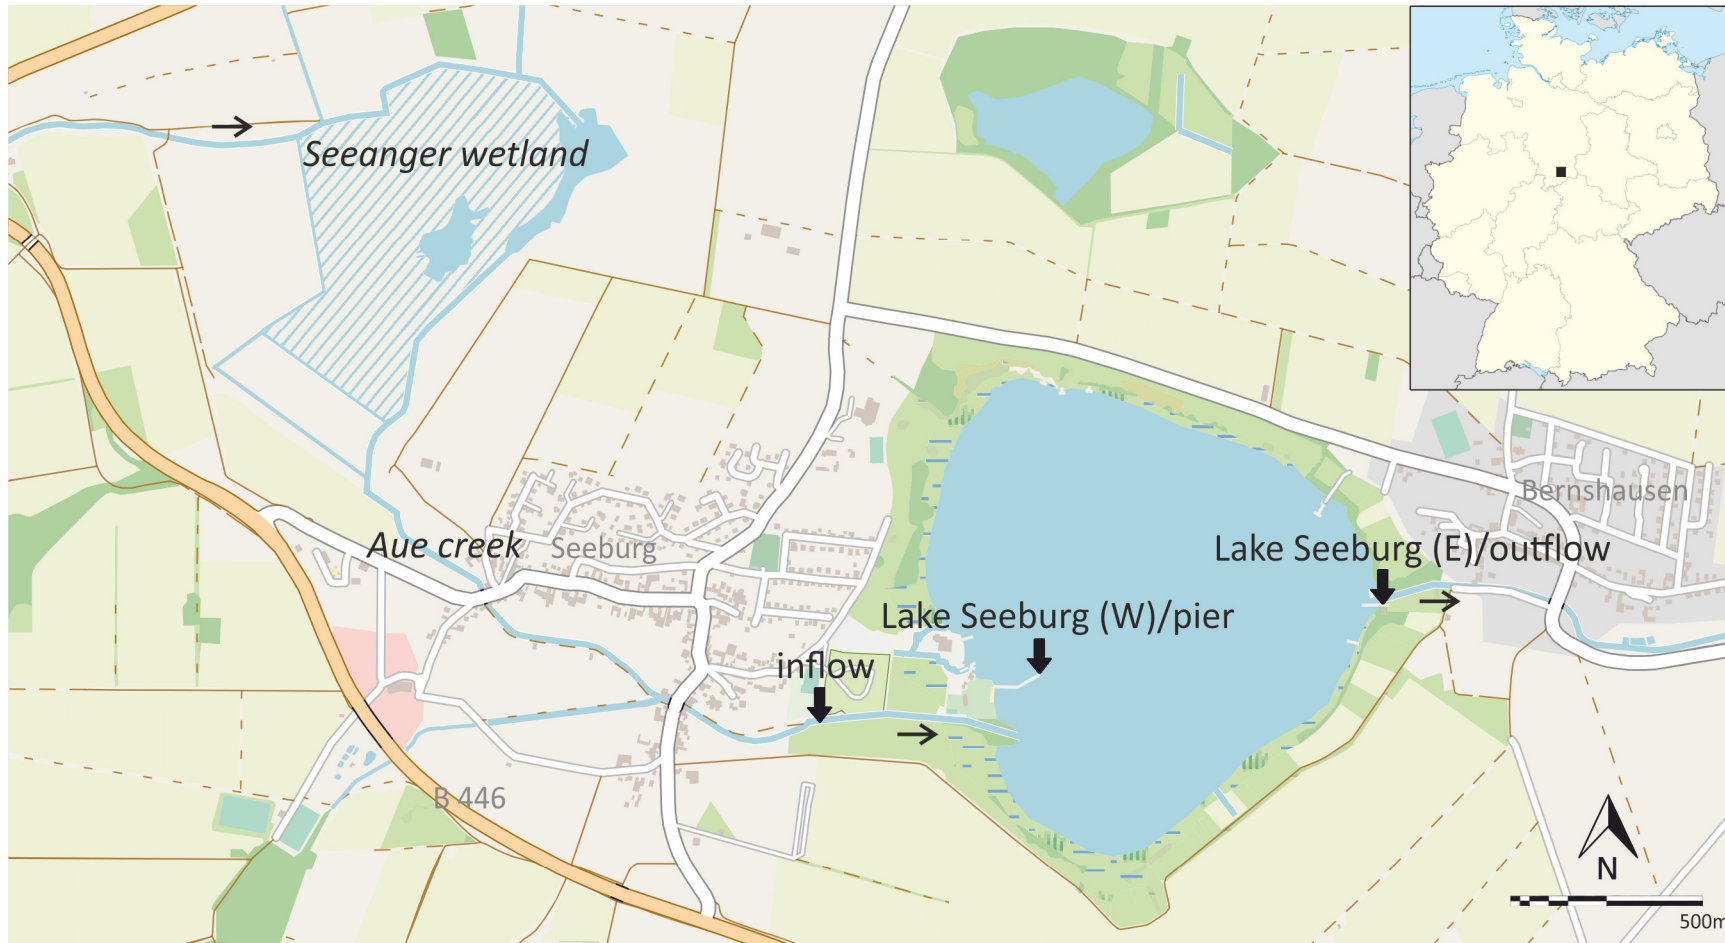

**Figure S1. Map of Lake Seeburg showing the sampling locations (arrows) at the main inflow (Aue creek), the western part of the lake (bathing pier) and the eastern part near the outflow. The shaded area represents the Seeanger wetland upstream of the main tributary (Aue creek).**

**Table S1: Standards used for IC analyses of cations and anions**

|                       |                       | 1 [mg/L] | 2 [mg/L] | 3 [mg/L] | 4 [mg/L] | 5 [mg/L] | 6 [mg/L] | 7 [mg/L] | 8 [mg/L] | 9 [mg/L] | 10 [mg/L] |
|-----------------------|-----------------------|----------|----------|----------|----------|----------|----------|----------|----------|----------|-----------|
| standards for anions  | <b>NO<sub>3</sub></b> | 100      | 80       | 60       | 40       | 20       | 20       | 10       | 5        | 2        | 1         |
|                       | <b>Cl</b>             | 100      | 80       | 60       | 40       | 20       | 20       | 10       | 5        | 2        | 1         |
|                       | <b>SO<sub>4</sub></b> | 100      | 80       | 60       | 40       | 20       | 20       | 10       | 5        | 2        | 1         |
|                       | <b>F</b>              | 5        | 4        | 3        | 2        | 1        | 2        | 1        | 0,5      | 0,2      | 0,1       |
|                       | <b>PO<sub>4</sub></b> | 5        | 4        | 3        | 2        | 1        | 2        | 1        | 0,5      | 0,2      | 0,1       |
|                       | <b>Br</b>             | 5        | 4        | 3        | 2        | 1        | 2        | 1        | 0,5      | 0,2      | 0,1       |
| standards for cations | <b>Ca</b>             | 200      | 100      | 80       | 40       | 20       | 10       | 5        | 2        | 1        |           |
|                       | <b>Mg</b>             | 100      | 50       | 40       | 20       | 10       | 5        | 2        | 1        | 0,5      |           |
|                       | <b>Na</b>             | 200      | 100      | 80       | 40       | 20       | 10       | 5        | 2        | 1        |           |
|                       | <b>K</b>              | 100      | 20       | 15       | 10       | 5        | 2        | 1        | 0,5      | 0,2      |           |
|                       | <b>Li</b>             | -        | -        | -        | -        | -        | 2        | 1        | 0,5      | 0,2      |           |
|                       | <b>Sr</b>             | -        | -        | -        | -        | -        | 2        | 1        | 0,5      | 0,2      |           |
|                       | <b>Ba</b>             | -        | -        | -        | -        | -        | 2        | 1        | 0,5      | 0,2      |           |

**Table S2: Compilation of the data obtained at the sampling positions in 2017**

| Date          | Location                | Temperature<br>°C | pH  | Oxygen<br>mg L <sup>-1</sup> | Alkalinity<br>meq L <sup>-1</sup> | SRP<br>mg L <sup>-1</sup> | Nitrite<br>mg L <sup>-1</sup> | Nitrate<br>mg L <sup>-1</sup> | Ammonium<br>mg L <sup>-1</sup> | Calcium<br>mg L <sup>-1</sup> | Chloride<br>mg L <sup>-1</sup> |
|---------------|-------------------------|-------------------|-----|------------------------------|-----------------------------------|---------------------------|-------------------------------|-------------------------------|--------------------------------|-------------------------------|--------------------------------|
| January '17   | inflow                  | 2.4               | 8.3 |                              | 4.64                              | 0.172                     | 0.008                         | 19.440                        | 0.066                          | 134.6                         | 46.7                           |
|               | Lake Seeburg<br>outflow |                   |     |                              |                                   |                           |                               |                               |                                |                               |                                |
| February '17  | inflow                  | 3.8               | 7.9 |                              | 4.56                              | 0.172                     | 0.008                         | 21.469                        | 0.277                          | 139.0                         | 29.4                           |
|               | Lake Seeburg<br>outflow |                   | 8.0 |                              | 3.8                               |                           | 0.007                         | 4.687                         | 0.035                          | 112.3                         | 32.5                           |
| March '17     | inflow                  | 9.5               | 8.2 |                              | 4.36                              | 0.166                     | 0.090                         | 18.736                        | 0.042                          | 128.0                         | 32.0                           |
|               | Lake Seeburg            | 9.3               | 8.5 |                              | 3.14                              | 0.163                     | 0.050                         | 1.278                         | 0.033                          | 95.4                          | 31.9                           |
|               | outflow                 | 9.3               | 8.6 |                              | 3.24                              | 0.171                     | 0.050                         | 1.654                         | 0.035                          | 96.8                          | 31.8                           |
| April '17     | inflow                  | 6.0               | 8.3 | 14.57                        | 4.02                              | 0.136                     | 0.022                         | 17.909                        | 0.374                          | 120.6                         | 28.7                           |
|               | Lake Seeburg            | 9.8               | 8.2 | 11.70                        | 3.22                              | 0.062                     | 0.015                         | 2.581                         | 0.131                          | 98.3                          | 31.7                           |
|               | outflow                 | 9.8               | 8.2 | 12.11                        | 3.32                              | 0.046                     | 0.015                         | 2.009                         | 0.068                          | 100.3                         | 31.5                           |
| May '17       | inflow                  | 15.1              | 7.9 | 8.06                         | 3.8                               | 0.262                     | 0.253                         | 14.760                        | 0.307                          | 110.1                         | 25.5                           |
|               | Lake Seeburg            | 19.0              | 8.3 | 9.14                         | 3.14                              | 0.031                     | 0.003                         | 1.654                         | 0.144                          | 96.3                          | 31.9                           |
|               | outflow                 | 19.1              | 8.2 | 8.77                         | 3.34                              | 0.035                     | 0.004                         | 1.819                         | 0.166                          | 95.8                          | 32.2                           |
| June '17      | inflow                  | 17.3              | 8.1 | 7.60                         | 3.76                              | 0.344                     | 0.365                         | 13.212                        | 0.127                          | 126.8                         | 21.7                           |
|               | Lake Seeburg            | 22.5              | 8.4 | 9.16                         | 2.86                              | 0.351                     | 0.013                         | 0.708                         | 0.091                          | 91.2                          | 31.2                           |
|               | outflow                 | 22.7              | 8.4 | 9.48                         | 2.74                              | 0.266                     | 0.028                         | 0.750                         |                                |                               | 31.1                           |
| July '17      | inflow                  | 16.5              | 8.0 | 8.17                         | 4.32                              | 0.306                     |                               | 15.988                        | 0.006                          | 125.2                         | 28.0                           |
|               | Lake Seeburg            | 22.1              | 8.6 | 12.33                        | 3.46                              | 0.330                     |                               | 1.204                         | 0.008                          | 90.6                          | 31.7                           |
|               | outflow                 | 22.9              | 8.6 | 12.62                        | 3.3                               | 0.346                     |                               | 1.205                         | 0.008                          | 91.2                          | 31.6                           |
| August '17    | inflow                  | 19.5              | 7.3 | 0.22                         | 4.44                              | 1.355                     |                               | 1.215                         | 0.708                          | 107.2                         | 23.1                           |
|               | Lake Seeburg            | 22.1              | 8.7 | 10.45                        | 2.88                              | 0.262                     |                               | 1.224                         | 0.634                          | 73.3                          | 26.5                           |
|               | outflow                 | 23.0              | 8.7 | 12.34                        | 2.84                              | 0.249                     |                               | 1.221                         | 0.584                          | 73.9                          | 26.5                           |
| September '17 | inflow                  | 16.0              | 7.7 | 7.61                         | 4.06                              | 0.230                     |                               | 14.591                        | 0.140                          | 119.9                         | 28.8                           |
|               | Lake Seeburg            | 19.4              | 8.4 | 8.13                         | 3.12                              | 0.780                     |                               | 1.032                         | 0.322                          | 78.2                          | 26.2                           |
|               | outflow                 | 19.8              | 8.5 | 9.46                         | 2.96                              | 0.654                     |                               | 1.178                         | 0.418                          | 77.6                          | 26.3                           |
| October '17   | inflow                  | 12.8              | 7.5 | 7.47                         | 3.72                              | 0.239                     | 0.050                         | 8.323                         | 0.120                          | 104.4                         | 24.8                           |
|               | Lake Seeburg            | 15.5              | 8.3 | 7.54                         | 2.84                              | 0.183                     | 0.010                         | 0.896                         | 0.102                          | 81.3                          | 26.5                           |
|               | outflow                 | 15.5              | 8.1 | 7.3                          | 2.92                              | 0.161                     | 0.020                         | 1.004                         | 0.183                          | 81.3                          | 26.4                           |
| November '17  | inflow                  | 8.4               | 7.7 | 7.05                         | 4.48                              | 0.128                     |                               | 15.902                        | 0.206                          | 129.5                         | 29.0                           |
|               | Lake Seeburg            | 8.6               | 7.7 | 6.74                         | 3.16                              | 0.096                     |                               | 2.339                         | 0.283                          | 90.5                          | 27.1                           |
|               | outflow                 | 8.7               | 7.6 | 6.41                         | 3.1                               | 0.084                     |                               | 2.209                         | 0.205                          | 90.8                          | 27.1                           |
| December '17  | inflow                  | 3.4               | 7.7 | 11.26                        | 4.8                               | 0.018                     |                               | 15.824                        | 0.247                          | 121.3                         | 34.2                           |
|               | Lake Seeburg            | 2.5               | 8.0 | 12.28                        | 3.58                              | 0.008                     |                               | 4.234                         | 0.165                          | 99.0                          | 28.1                           |
|               | outflow                 | 2.6               | 7.9 | 12.51                        | 3.46                              | 0.007                     |                               | 3.659                         | 0.163                          | 98.2                          | 27.4                           |

**Table S2 (continued): Compilation of the data obtained at the sampling positions in 2018**

| Date          | Location     | Temperature<br>°C | pH  | Oxygen<br>mg L <sup>-1</sup> | Alkalinity<br>meq L <sup>-1</sup> | SRP<br>mg L <sup>-1</sup> | Nitrite<br>mg L <sup>-1</sup> | Nitrate<br>mg L <sup>-1</sup> | Ammonium<br>mg L <sup>-1</sup> | Calcium<br>mg L <sup>-1</sup> | Chloride<br>mg L <sup>-1</sup> |
|---------------|--------------|-------------------|-----|------------------------------|-----------------------------------|---------------------------|-------------------------------|-------------------------------|--------------------------------|-------------------------------|--------------------------------|
| January '18   | inflow       | 3.8               | 7.7 | 11                           | 4.48                              | 0.220                     | 0.069                         | 17.163                        | 0.177                          | 122.0                         | 28.3                           |
|               | Lake Seeburg | 3.2               | 7.9 | 12.2                         | 3.72                              | 0.105                     | 0.040                         | 5.618                         | 0.101                          | 102.2                         | 26.7                           |
|               | outflow      | 3.2               | 7.9 | 13.5                         | 3.76                              | 0.103                     | 0.040                         | 5.105                         | 0.140                          | 102.2                         | 26.7                           |
| February '18  | inflow       | 3.1               | 7.2 | 12.16                        | 3.98                              | 0.135                     | 0.041                         | 19.673                        | 0.062                          | 132.3                         | 32.2                           |
|               | Lake Seeburg | 2.5               | 8.1 | 12.95                        | 4.06                              | 0.055                     | 0.074                         | 6.493                         | 0.012                          | 111.8                         | 29.3                           |
|               | outflow      | 2.6               | 8.0 | 12.89                        | 3.90                              | 0.056                     | 0.039                         | 6.692                         | 0.013                          | 112.1                         | 29.5                           |
| March '18     | inflow       | 7.7               | 7.7 | 10.08                        | 4.06                              | 0.124                     | 0.093                         | 21.551                        | 0.096                          | 109.8                         | 39.4                           |
|               | Lake Seeburg | 6.4               | 7.9 | 12.08                        | 3.90                              | 0.015                     | 0.026                         | 8.244                         | 0.042                          | 102.9                         | 35.0                           |
|               | outflow      | 5.8               | 8.2 | 12.05                        | 3.92                              | 0.007                     | 0.026                         | 6.975                         | 0.044                          | 102.5                         | 35.2                           |
| April '18     | inflow       | 13.3              | 8.4 | 14.1                         | 4.20                              | 0.149                     | 0.157                         | 15.754                        | 0.052                          | 114.9                         | 32.1                           |
|               | Lake Seeburg | 12.7              | 8.2 | 10.97                        | 4.04                              | 0.017                     | 0.052                         | 5.318                         | 0.052                          | 108.9                         | 31.5                           |
|               | outflow      | 13.9              | 8.2 | 11.07                        | 3.98                              | 0.036                     | 0.058                         | 5.463                         | 0.063                          | 107.9                         | 31.9                           |
| May '18       | inflow       | 15.6              | 8.0 | 8.13                         | 4.30                              | 0.241                     | 0.482                         | 17.785                        | 0.207                          | 123.6                         | 31.1                           |
|               | Lake Seeburg | 18.5              | 8.4 | 12.2                         | 3.94                              | 0.017                     | 0.079                         | 2.010                         | 0.055                          | 99.5                          | 33.8                           |
|               | outflow      | 18.7              | 8.4 | 13.17                        | 3.82                              | 0.011                     | 0.062                         | 1.608                         | 0.071                          | 105.2                         | 33.4                           |
| June '18      | inflow       | 17.8              | 8.3 | 9.19                         | 4.00                              | 0.267                     | 0.255                         | 17.139                        | 0.038                          | 120.6                         | 28.0                           |
|               | Lake Seeburg | 25.6              | 8.6 | 11.66                        | 3.38                              | 0.042                     | 0.008                         | 0.025                         | 0.020                          | 93.0                          | 32.5                           |
|               | outflow      | 26.0              | 8.6 | 11.83                        | 3.28                              | 0.052                     | 0.008                         | 0.029                         | 0.015                          | 90.7                          | 32.6                           |
| July '18      | inflow       | 14.5              | 8.2 | 8.81                         | 3.66                              | 0.214                     | 0.112                         | 17.765                        | 0.054                          | 112.7                         | 28.0                           |
|               | Lake Seeburg | 22.2              | 8.8 | 14.15                        | 2.78                              | 0.045                     | 0.007                         | 0.024                         | 0.022                          | 75.0                          | 32.9                           |
|               | outflow      | 20.9              | 8.7 | 12.51                        | 2.74                              | 0.024                     | 0.016                         | 0.028                         | 0.022                          | 79.0                          | 32.9                           |
| August '18    | inflow       | 18.9              | 8.1 | 7.61                         | 3.96                              | 0.306                     | 0.078                         | 18.640                        | 0.020                          | 118.8                         | 27.6                           |
|               | Lake Seeburg | 25.9              | 8.8 | 11.4                         | 1.74                              | 0.206                     | 0.014                         | 0.043                         | 0.021                          | 54.6                          | 33.7                           |
|               | outflow      | 25.2              | 8.8 | 11.7                         | 1.40                              | 0.099                     | 0.012                         | 0.047                         | 0.028                          | 46.6                          | 34.0                           |
| September '18 | inflow       | 14.3              | 8.1 | 8.38                         | 3.88                              | 0.199                     | 0.044                         | 19.504                        | 0.023                          | 127.4                         | 27.0                           |
|               | Lake Seeburg | 19.2              | 9.3 | 12.69                        | 2.64                              | 0.618                     | 0.031                         | 0.062                         | 0.017                          | 71.6                          | 34.3                           |
|               | outflow      | 18.4              | 9.0 | 7.75                         | 2.70                              | 0.667                     | 0.012                         | 0.037                         | 0.017                          | 70.1                          | 34.4                           |
| October '18   | inflow       | 9.8               | 8.2 | 10.06                        | 3.94                              | 0.150                     | 0.089                         | 19.366                        | 0.033                          | 127.1                         | 27.0                           |
|               | Lake Seeburg | 13.7              | 9.0 | 10.5                         | 3.08                              | 0.681                     | 0.033                         | 0.342                         | 0.029                          | 76.3                          | 33.8                           |
|               | outflow      | 13.3              | 8.7 | 8.4                          | 3.06                              | 0.687                     | 0.038                         | 0.314                         | 0.023                          | 68.8                          | 33.9                           |
| November '18  | inflow       | 9.7               | 8.1 | 9.06                         | 4.20                              | 0.156                     | 0.098                         | 19.657                        | 0.014                          | 126.1                         | 26.9                           |
|               | Lake Seeburg | 9.0               | 8.0 | 6.3                          | 3.10                              | 0.408                     | 0.038                         | 0.696                         | 0.319                          | 84.6                          | 32.9                           |
|               | outflow      | 9.3               | 7.9 | 4.53                         | 3.22                              | 0.414                     | 0.050                         | 0.711                         | 0.356                          | 86.3                          | 32.9                           |
| December '18  | inflow       | 5.3               | 8.0 | 10.58                        | 3.30                              | 0.333                     | 0.056                         | 14.812                        | 0.026                          | 111.7                         | 30.6                           |
|               | Lake Seeburg | 5.1               | 8.5 | 11.6                         | 3.22                              | 0.341                     | 0.047                         | 2.274                         | 0.329                          | 90.0                          | 31.5                           |
|               | outflow      | 4.9               | 8.5 | 12.01                        | 3.20                              | 0.323                     | 0.064                         | 2.523                         | 0.251                          | 91.8                          | 32.1                           |

**Table S2 (continued): Compilation of the data obtained at the sampling positions in 2019**

| Date          | Location     | Temperature<br>°C | pH  | Oxygen<br>mg L <sup>-1</sup> | Alkalinity<br>meq L <sup>-1</sup> | SRP<br>mg L <sup>-1</sup> | Nitrite<br>mg L <sup>-1</sup> | Nitrate<br>mg L <sup>-1</sup> | Ammonium<br>mg L <sup>-1</sup> | Calcium<br>mg L <sup>-1</sup> | Chloride<br>mg L <sup>-1</sup> |
|---------------|--------------|-------------------|-----|------------------------------|-----------------------------------|---------------------------|-------------------------------|-------------------------------|--------------------------------|-------------------------------|--------------------------------|
| January '19   | inflow       | 6.0               | 8.1 | 10.42                        | 4.02                              | 0.224                     | 0.059                         | 20.357                        | 0.039                          | 134.2                         | 38.4                           |
|               | Lake Seeburg | 4.2               | 8.5 | 12.33                        | 3.42                              | 0.210                     | 0.039                         | 5.410                         | 0.141                          | 97.1                          | 31.3                           |
|               | outflow      | 4.2               | 8.8 | 12.95                        | 3.38                              | 0.208                     | 0.041                         | 4.894                         | 0.108                          | 98.6                          | 32.7                           |
| February '19  | inflow       | 4.2               | 7.7 | 11.87                        | 3.64                              | 0.174                     | 0.046                         | 21.396                        | 0.017                          | 119.6                         | 42.5                           |
|               | Lake Seeburg | 3.7               | 8.1 | 12.71                        | 3.08                              | 0.073                     | 0.023                         | 4.078                         | 0.015                          | 101.4                         | 33.5                           |
|               | outflow      | 3.8               | 8.2 | 13.87                        | 3.20                              | 0.057                     | 0.022                         | 6.271                         | 0.012                          | 101.9                         | 34.8                           |
| March '19     | inflow       | 8.6               | 7.6 | 11.53                        | 3.96                              | 0.156                     | 0.068                         | 16.471                        | 0.071                          | 118.7                         | 29.6                           |
|               | Lake Seeburg | 7.3               | 8.5 | 12.55                        | 3.22                              | 0.015                     | 0.032                         | 4.312                         | 0.022                          | 102.6                         | 33.6                           |
|               | outflow      | 7.7               | 8.5 | 12.58                        | 3.14                              | 0.025                     | 0.030                         | 4.427                         | 0.032                          | 103.4                         | 33.9                           |
| April '19     | inflow       | 8.8               | 8.2 | 13.43                        | 4.18                              | 0.132                     | 0.055                         | 15.887                        | 0.023                          | 115.1                         | 30.1                           |
|               | Lake Seeburg | 10.4              | 8.4 | 11.67                        | 3.26                              | 0.020                     | 0.028                         | 2.059                         | 0.031                          | 99.9                          | 32.4                           |
|               | outflow      | 11.0              | 8.4 | 12.38                        | 3.20                              | 0.017                     | 0.028                         | 2.031                         | 0.050                          | 98.1                          | 33.5                           |
| May '19       | inflow       | 9.8               | 8.3 | 11.58                        | 3.72                              | 0.175                     | 0.063                         | 15.666                        | 0.027                          | 113.9                         | 28.3                           |
|               | Lake Seeburg | 13.7              | 8.4 | 9.93                         | 2.84                              | 0.043                     | 0.026                         | 0.897                         | 0.016                          | 101.0                         | 32.6                           |
|               | outflow      | 13.8              | 8.5 | 11.91                        | 3.10                              | 0.025                     | 0.025                         | 0.777                         | 0.035                          | 100.0                         | 32.7                           |
| June '19      | inflow       | 18.3              | 8.0 | 6.42                         | 3.26                              | 0.340                     | 0.381                         | 9.339                         | 0.249                          | 93.7                          | 22.0                           |
|               | Lake Seeburg | 25.6              | 8.9 | 9.64                         | 3.08                              | 0.034                     | 0.004                         | 0.041                         | 0.038                          | 97.7                          | 30.8                           |
|               | outflow      | 25.3              | 8.8 | 8.96                         | 2.98                              | 0.039                     | 0.007                         | 0.060                         | 0.058                          | 98.2                          | 30.9                           |
| July '19      | inflow       | 17.0              | 7.8 | 6.36                         | 4.12                              | 0.499                     | 0.422                         | 8.253                         | 0.101                          | 116.0                         | 21.0                           |
|               | Lake Seeburg | 24.7              | 8.3 | 8.07                         | 3.62                              | 0.191                     | 0.013                         | 0.004                         | 0.023                          | 95.7                          | 23.6                           |
|               | outflow      | 23.1              | 8.2 | 7.32                         | 3.54                              | 0.181                     | 0.009                         | 0.000                         | 0.025                          | 95.1                          | 23.1                           |
| August '19    | inflow       | 18.1              | 7.9 | 6.54                         | 3.80                              | 0.415                     | 0.080                         | 12.048                        | 0.042                          | 122.7                         | 26.4                           |
|               | Lake Seeburg | 24.0              | 8.5 | 6.85                         | 3.52                              | 0.427                     | 0.015                         | 0.073                         | 0.115                          | 97.7                          | 30.7                           |
|               | outflow      | 24.9              | 8.6 | 7.39                         | 3.42                              | 0.329                     | 0.014                         | 0.000                         | 0.024                          | 96.7                          | 30.9                           |
| September '19 | inflow       | 18.6              | 8.0 | 7.06                         | 4.04                              | 0.307                     | 0.025                         | 13.567                        | 0.031                          | 123.4                         | 26.1                           |
|               | Lake Seeburg | 24.4              | 8.9 | 11.4                         | 3.56                              | 0.354                     | 0.017                         | 0.000                         | 0.027                          | 97.6                          | 31.3                           |
|               | outflow      | 23.6              | 8.7 | 8.72                         | 3.62                              | 0.373                     | 0.020                         | 0.001                         | 0.031                          | 98.8                          | 31.1                           |
| October '19   | inflow       | 13.1              | 8.1 | 8.28                         | 4.20                              | 0.242                     | 0.025                         | 12.815                        | 0.030                          | 119.6                         | 24.6                           |
|               | Lake Seeburg | 15.5              | 8.9 | 11.25                        | 2.82                              | 0.130                     | 0.027                         | 0.006                         | 0.022                          | 79.3                          | 30.7                           |
|               | outflow      | 15.5              | 9.0 | 12.26                        | 2.82                              | 0.084                     | 0.025                         | 0.003                         | 0.034                          | 76.9                          | 30.8                           |
| November '19  | inflow       | 10.3              | 7.9 | 9.41                         | 4.32                              | 0.204                     | 0.060                         | 14.517                        | 0.029                          | 126.0                         | 25.9                           |
|               | Lake Seeburg | 9.9               | 8.7 | 10.30                        | 2.90                              | 0.145                     | 0.016                         | 0.108                         | 0.015                          | 81.2                          | 29.9                           |
|               | outflow      | 10.4              | 8.7 | 10.56                        | 2.80                              | 0.137                     | 0.017                         | 0.063                         | 0.017                          | 80.3                          | 30.1                           |
| December '19  | inflow       | 6.5               | 7.9 | 10.54                        | 4.50                              | 0.163                     | 0.059                         | 8.585                         | 0.056                          | 128.0                         | 21.8                           |
|               | Lake Seeburg | 4.5               | 8.3 | 11.60                        | 3.28                              | 0.251                     | 0.029                         | 0.004                         | 0.220                          | 85.0                          | 24.6                           |
|               | outflow      | 4.4               | 8.2 | 11.38                        | 3.10                              | 0.250                     | 0.034                         | 0.000                         | 0.209                          | 86.2                          | 24.0                           |

**Table S3: Lake inflow between April 2018 and December 2019**

| Date          | Waterflow<br>L s <sup>-1</sup> |
|---------------|--------------------------------|
| April '18     | 225                            |
| May '18       | 157                            |
| June '18      | 136                            |
| July '18      | 115                            |
| August '18    | 99                             |
| September '18 | 95                             |
| October '18   | 84                             |
| November '18  | 97                             |
| December '18  | 195                            |
| January '19   | 223                            |
| February '19  | 315                            |
| March '19     | 148                            |
| April '19     | 124                            |
| May '19       | 117                            |
| June '19      | 146                            |
| July '19      | 98                             |
| August '19    | 87                             |
| September '19 | 72                             |
| October '19   | 117                            |
| November '19  | 92                             |
| December '19  | 116                            |

**Table S4: Soluble reactive phosphate (SRP) concentrations in the pore water of the lake sediment in 2018.**

| Date          | SRP<br>mg L <sup>-1</sup> |
|---------------|---------------------------|
| January '18   | 1.677                     |
| February '18  | 0.614                     |
| March '18     | 0.003                     |
| April '18     | 0.359                     |
| May '18       | 12.303                    |
| June '18      | 3.441                     |
| July '18      | 3.232                     |
| August '18    | 7.767                     |
| September '18 | 34.369                    |
| October '18   | 0.579                     |
| November '18  | 1.468                     |
| December '18  | 0.398                     |

**Table S5: Quality classification for nutrients according to the "Bund/Länder-Arbeitsgemeinschaft Wasser" (LAWA), (abbreviated from <https://www.nlwkn.niedersachsen.de/download/92683>, last accessed 12.05.2021, according to Grage et al., 2014)**

| Nutrient<br>[mg/L]               | Quality class |        |        |        |       |        |       |
|----------------------------------|---------------|--------|--------|--------|-------|--------|-------|
|                                  | I             | I-II   | II     | II-III | III   | III-IV | IV    |
| NO <sub>3</sub> <sup>-</sup> -N  | ≤ 1           | ≤ 1.5  | ≤ 2.5  | ≤ 5    | ≤ 10  | ≤ 20   | > 20  |
| NO <sub>2</sub> <sup>-</sup> -N  | ≤ 0.01        | ≤ 0.05 | ≤ 0.1  | ≤ 0.2  | ≤ 0.4 | ≤ 0.8  | > 0.8 |
| NH <sub>4</sub> <sup>+</sup> -N  | ≤ 0.04        | ≤ 0.1  | ≤ 0.3  | ≤ 0.6  | ≤ 1.2 | ≤ 2.4  | > 2.4 |
| PO <sub>4</sub> <sup>3-</sup>    | ≤ 0.05        | ≤ 0.08 | ≤ 0.15 | ≤ 0.3  | ≤ 0.6 | ≤ 1.2  | > 1.2 |
| PO <sub>4</sub> <sup>3-</sup> -P | ≤ 0.02        | ≤ 0.04 | ≤ 0.1  | ≤ 0.2  | ≤ 0.4 | ≤ 0.8  | > 0.8 |

Nitrate:

- inflow: III-IV
- lake: II (mean), III (max)

Ammonium:

- inflow: II (mean 2017), I-II (mean 2018/2019), III (max)
- lake: II (mean 2017), I-II (mean 2018/2019)

Nitrite:

- inflow: II-III (mean), III (max 2017), III-IV (max 2018/2019)
- lake: I-II

Soluble reactive phosphate (SRP)

- inflow: II-III (mean), IV (max 2017), III (max 2018/2019)
- lake: II-III (mean), III-IV (max 2017/2018), III (max 2019)



**Table S6: Calculations of soluble reactive phosphate (SRP) in- and outputs and dissolutions from the sediment:**

|                         | Water volume<br>in- and outflow [L/s] | SRP conc.<br>(inflow) [mg/L] | SRP conc.<br>(outflow) [mg/L] | Inflow<br>[kg/day] | Outflow<br>[kg/day] | Difference<br>[kg/day] | Redissolution from<br>sediment [g/m <sup>2</sup> day] <sup>2)</sup> | Redissolution from<br>sediment [kg/day] <sup>2)</sup> |
|-------------------------|---------------------------------------|------------------------------|-------------------------------|--------------------|---------------------|------------------------|---------------------------------------------------------------------|-------------------------------------------------------|
| July 2017 <sup>1)</sup> | 550                                   | 1.355                        | 0.249                         | 64.3               | 11.8                | 52.6                   |                                                                     |                                                       |
| January 2018            |                                       | 0.220                        | 0.103                         |                    |                     |                        | 0.0032                                                              | 2.85                                                  |
| February 2018           |                                       | 0.135                        | 0.056                         |                    |                     |                        | 0.0011                                                              | 0.98                                                  |
| March 2018              |                                       | 0.124                        | 0.007                         |                    |                     |                        | -0.000016                                                           | -0.014                                                |
| April 2018              | 225                                   | 0.149                        | 0.036                         | 2.9                | 0.7                 | 2.2                    | 0.00068                                                             | 0.61                                                  |
| May 2018                | 157                                   | 0.241                        | 0.011                         | 3.3                | 0.1                 | 3.1                    | 0.025                                                               | 22.25                                                 |
| June 2018               | 136                                   | 0.267                        | 0.052                         | 3.1                | 0.6                 | 2.5                    | 0.007                                                               | 6.23                                                  |
| July 2018               | 115                                   | 0.214                        | 0.024                         | 2.1                | 0.2                 | 1.9                    | 0.0065                                                              | 5.785                                                 |
| August 2018             | 99                                    | 0.306                        | 0.099                         | 2.6                | 0.8                 | 1.8                    | 0.0155                                                              | 13.8                                                  |
| September 2018          | 95                                    | 0.199                        | 0.667                         | 1.6                | 5.5                 | -3.8                   | 0.069                                                               | 61.4                                                  |
| October 2018            | 84                                    | 0.15                         | 0.687                         | 1.1                | 5.0                 | -3.9                   | -0.0002                                                             | -0.178                                                |
| November 2018           | 97                                    | 0.156                        | 0.414                         | 1.3                | 3.5                 | -2.2                   | 0.002                                                               | 1.78                                                  |
| December 2018           | 195                                   | 0.333                        | 0.323                         | 5.6                | 5.4                 | 0.2                    | 0.0003                                                              | 0.267                                                 |
| January 2019            | 223                                   | 0.224                        | 0.208                         | 4.3                | 4.0                 | 0.3                    |                                                                     |                                                       |
| February 201            | 315                                   | 0.174                        | 0.057                         | 4.7                | 1.6                 | 3.2                    |                                                                     |                                                       |
| March 2019              | 148                                   | 0.156                        | 0.025                         | 2.0                | 0.3                 | 1.7                    |                                                                     |                                                       |
| April 2019              | 124                                   | 0.132                        | 0.017                         | 1.4                | 0.2                 | 1.2                    |                                                                     |                                                       |
| May 2019                | 117                                   | 0.175                        | 0.025                         | 1.8                | 0.3                 | 1.5                    |                                                                     |                                                       |
| June 2019               | 146                                   | 0.34                         | 0.039                         | 4.3                | 0.5                 | 3.8                    |                                                                     |                                                       |
| July 2019               | 98                                    | 0.499                        | 0.181                         | 4.2                | 1.5                 | 2.7                    |                                                                     |                                                       |
| August 2019             | 87                                    | 0.415                        | 0.329                         | 3.1                | 2.5                 | 0.6                    |                                                                     |                                                       |
| September 2019          | 72                                    | 0.307                        | 0.373                         | 1.9                | 2.3                 | -0.4                   |                                                                     |                                                       |
| October 2019            | 117                                   | 0.242                        | 0.084                         | 2.4                | 0.8                 | 1.6                    |                                                                     |                                                       |
| November 2019           | 92                                    | 0.204                        | 0.137                         | 1.6                | 1.1                 | 0.5                    |                                                                     |                                                       |
| December 2019           | 116                                   | 0.163                        | 0.250                         | 1.6                | 2.5                 | -0.9                   |                                                                     |                                                       |

<sup>1)</sup> The maximum flow through a weir (550 L/s) downstream of the Seeanger wetland was consistently reached during the heavy rain event.

<sup>2)</sup> For calculation see table 7.

**Table S7: Calculation of the amount of soluble reactive phosphate (SRP) released from the sediment into the pore water during the cyanobacterial bloom in 2018. Calculation according to Scholtysik et al., 2020.**

|                                                                                                                                                                                                                                                                       |
|-----------------------------------------------------------------------------------------------------------------------------------------------------------------------------------------------------------------------------------------------------------------------|
| $J_P = \frac{\varphi}{\theta^2} * D_P * \frac{\Delta C_P}{\Delta z}$                                                                                                                                                                                                  |
| $\phi = \frac{\frac{\omega}{\rho(\text{water})}}{\frac{\omega}{\rho(\text{water})} + \frac{1 - \omega}{\rho(\text{sediment})}} = \frac{\frac{0.7}{1}}{\frac{0.7}{1} + \frac{1 - 0.7}{2.43}} = 0.85$                                                                   |
| $\rho(\text{sediment}) = \frac{1}{\frac{LOI}{\rho(\text{org})} + \frac{1 - LOI}{\rho(\text{min})}} = \frac{1}{\frac{0.10}{1.4} + \frac{1 - 0.1}{2.65}} \text{ g cm}^{-3} = 2.43 \text{ g cm}^{-3}$                                                                    |
| $\theta = \sqrt{1 - \ln \Phi^2} = \sqrt{1 - \ln(0.84)^2} = 0.98$                                                                                                                                                                                                      |
| $J_P = \frac{\varphi}{\theta^2} * D_P * \frac{\Delta C_P}{\Delta z} = \frac{0.84}{0.98^2} * 4.7 * 10^{-5} * \frac{34.4 - 0.69}{0.02} \text{ g m}^{-2} \text{ day}^{-1} = 0.069 \text{ g m}^{-2} \text{ day}^{-1} = 61.4 \text{ kg day}^{-1} \text{ in the hole lake}$ |

where:

- $J_P$  is the diffusion rate of P ( $\text{g m}^{-2} \text{ day}^{-1}$ )
- $\varphi$  is the porosity
- $\rho$  is the density [ $\text{g cm}^{-3}$ ]
- $\theta$  is the tortuosity
- $D_P$  is the molar diffusion coefficient of Phosphate in the sediment ( $5.5 * 10^{-6} \text{ cm}^2 \text{ s}^{-1}$  or  $4.7 * 10^{-5} \text{ m}^2 \text{ s}^{-1}$ )\*

\* according to Bourdreau, BP. (1997). Diagenetic models and their implementation. Vol. 410. Springer, Berlin.
